# Supplementary material for: Variability in the Chemical Composition of a New Aromatic Plant Artemisia balchanorum in Southern Russia
Source: MDPI journal article supplement (doi:10.3390/plants11010006), 2021-12-21
Supplement: s1 [file s1]

**Supplementary Table S1.** Composition of essential oil (%) in *A. balchanorum* cultivar 130 at various stages of development and *in vitro* propagated plantlets. I, vegetative; II, flower buds; III, full flowering. (+) – only traces detected; (-) – not detected

| #  | Compound             | Offspring population |             |             | <i>In vitro</i> |
|----|----------------------|----------------------|-------------|-------------|-----------------|
|    |                      | I                    | II          | III         | Plantlets       |
| 1  | Myrcene              | 0.17 ±0.01           | 0.09 ±0.004 | 0.03        | +               |
| 2  | 1,8-Cineole          | 0.18±0.01            | 0.42 ±0.02  | 0.13 ±0.01  | +               |
| 3  | γ-Terpineol          | 0.08±0.003           | 0.41 ±0.02  | +           | +               |
| 4  | α-Thujone            | +                    | 0.04        | 0.58±0.03   | +               |
| 5  | Linalool             | 11.2±0.6             | 50.8 ±2.52  | 3.66 ±0.18  | +               |
| 6  | β-Thujone            | -                    | -           | 0.03        | -               |
| 7  | Camphor              | 0.03                 | 0.2±0.01    | 0.32 ±0.02  | +               |
| 8  | Borneol              | 0.99±0.05            | +           | 0.38±0.02   | +               |
| 9  | Citronellal          | 3.79±0.18            | 14.1 ±0.7   | 0.75 ±0.04  | +               |
| 10 | α-Terpineol          | +                    | 0.14 ±0.01  | 0.43 ±0.02  | -               |
| 11 | <i>cis</i> -Citral   | 3.81±0.19            | 3.14 ±0.15  | 24.26 ±1.21 | 25.0±1.21*      |
| 12 | Geraniol             | 13.08±0.65           | 16.45 ±0.82 | 10.61± 0.52 | +               |
| 13 | <i>trans</i> -Citral | 6.13±0.31            | 3.88 ±0.19  | 38.68 ±1.92 | +               |
| 14 | Oxycitral            | +                    | 0.97 ±0.05  | 0.03        | +               |
| 15 | Geranyl acetate      | 53.09±2.65           | 7.59 ±0.38  | 8.46 ±0.42  | 70.0 ±3.44      |
| 16 | Geranyl propionate   | 0.22 ±0.01           | 0.46 ±0.02  | 1.14 ±0.06  | +               |

\*Total content of *cis*-Citral and *trans*-Citral.

**Supplementary Table S2.** Composition of the essential oils (%) in the offspring of four cultivars of *A. balchanorum* at three developmental stages: I, vegetative; II, flower buds; III, full flowering. (+) – only traces detected; (-) – not detected

| #  | Cultivar           | 192         |                |                | 210         |            |                | 136        |             |             | 150        |            |             |
|----|--------------------|-------------|----------------|----------------|-------------|------------|----------------|------------|-------------|-------------|------------|------------|-------------|
|    | Compound           | I           | II             | III            | I           | II         | III            | I          | II          | III         | I          | II         | III         |
| 1  | Myrcene            | 0.24 ±0.01  | 0.3±0.01       | 0.71±0.03      | 0.57 ±0.03  | 0.37 ±0.02 | 0.27 ±0.01     | +          | 0.29 ±0.01  | 0.46 ±0.02  | -          | 0.34±0.02  | +           |
| 2  | 1,8-Cineole        | +           | 0.04           | 0.04           | 0.4 ±0.02   | +          | 0.59 ±0.03     | 0.46 ±0.02 | 0.3 ±0.01   | 0.87 ±0.04  | +          | 0.04       | +           |
| 3  | γ-Terpineol        | 0.27 ±0.01  | 0.32±0.02      | 0.22±0.01      | 0.41 ±0.02  | 0.64 ±0.03 | 0.3 ±0.01      | 0.39 ±0.02 | 0.31 ±0.01  | 0.51 ±0.02  | 0.27 ±0.01 | 0.15±0.01  | 0.33 ±0.02  |
| 4  | α-Thujone          | +           | 0.03           | 0.05           | 0.24 ±0.01  | +          | 2.3 ±0.1       | 0.73 ±0.04 | 0.3 ±0.01   | 0.32 ±0.02  | 0.4 ±0.02  | +          | 0.03        |
| 5  | Linalool           | 37.44 ±1.87 | 40.7±2.03      | 40.6 ±2.02     | 1.47 ±0.07  | 4.8 ±0.2   | 3.89 ±0.19     | 32.8 ±1.61 | 25.54 ±1.28 | 32.12 ±1.60 | 36.33±1.82 | 20.0 ±0.9  | 35.98 ±1.79 |
| 6  | β-Thujone          | -           | +              | +              | 0.07 ±0.003 | 0.23 ±0.01 | +              | +          | 0.24 ±0.01  | 0.36 ±0.02  | -          | +          | 0.38 ±0.02  |
| 7  | Camphor            | +           | +              | +              | 0.2 ±0.01   | 0.18 ±0.01 | +              | 0.16 ±0.01 | 0.23 ±0.01  | 0.41 ±0.02  | +          | 0.21 ±0.01 | 0.44 ±0.02  |
| 8  | Borneol            | +           | 0.63 ±0.03     | 0.82±0.04      | 0.27 ±0.01  | +          | 0.61 ±0.03     | 0.03       | 0.62 ±0.02  | 0.36 ±0.02  | -          | +          | +           |
| 9  | Citronellal        | 1.74 ±0.08  | +              | +              | 1.55 ±0.08  | 0.78 ±0.04 | 0.24 ±0.01     | 4.0 ±0.19  | 0.21 ±0.01  | +           | 3.13 ±0.15 | 1.45±0.07  | 0.49 ±0.02  |
| 10 | α-Terpineol        | +           | 0.41 ±0.02     | 0.24 ±0.01     | 0.33 ±0.02  | 0.63 ±0.03 | 0.21 ±0.01     | 0.37 ±0.02 | 0.92 ±0.04  | 1.0 ±0.04   | 0.29 ±0.01 | 0.33±0.02  | +           |
| 11 | cis-Citral         | 2.41 ±0.12  | 5.31 ±0.26     | 6.03±0.30      | 12.49 ±0.62 | 17.47±0.87 | 7.48 ±0.37     | 1.63 ±0.08 | 15.5±0.8    | 15.92 ±0.79 | 2.62 ±0.11 | 13.97±0.69 | 16.87 ±0.84 |
| 12 | Geraniol           | 16.5 ±0.82  | 26.04<br>±1.29 | 16.69±0.8<br>3 | 15.38 ±0.76 | 10.2 ±0.51 | 34.3 ±1.71     | 6.07 ±0.30 | 10.59±0.52  | 5.79 ±0.29  | 10.5 ±0.52 | 12.98±0.64 | 5.62 ±0.28  |
| 13 | trans-Citral       | 3.71 ±0.18  | 7.74 ±0.38     | 8.04±0.40      | 19.8 ±1     | 27.74±1.38 | 10.05<br>±0.50 | 3.18 ±0.16 | 22.23±1.11  | 22.45 ±1.12 | 3.56 ±0.18 | 18.15±0.90 | 21.49 ±1.07 |
| 14 | Oxycitral          | +           | +              | 0.67±0.03      | -           | 0.47 ±0.02 | -              | +          | 0.03        | +           | 0.05       | 0.08±0.003 | +           |
| 15 | Geranyl acetate    | 36.23 ±1.81 | 17.63<br>±0.87 | 18.6±0.9       | 41.13 ±2.05 | 19.25±0.96 | 33.51<br>±1.67 | 41.5 ±2.06 | 13.42±0.66  | 9.26 ±0.46  | 40.27±2.01 | 22.9±1.14  | 15.24 ±0.76 |
| 16 | Geranyl propionate | 0.35 ±0.02  | 0.44 ±0.02     | 0.44±0.02      | 1.58 ±0.08  | 1.07 ±0.05 | 1.3 ±0.06      | 0.47 ±0.02 | 1.43 ±0.07  | 0.8 ±0.04   | 0.49 ±0.02 | 1.37±0.07  | 0.53 ±0.02  |

**Supplementary Table S3.** Analysis of variances by Two-way ANOVA for five dominant and two minor compounds of *Artemisia balchanorum* essential oil. Most compounds show significant statistical interaction between the cultivar and the developmental stage ( $\alpha=0.05$ ).

[illegible][illegible]

|  |  |  |  |  |
|--|--|--|--|--|
|  |  |  |  |  |
|  |  |  |  |  |

**Linalool**

| Source         | DF | Sum of Squares | Mean Square | F Ratio | Prob > F |
|----------------|----|----------------|-------------|---------|----------|
| Model          | 14 | 9307.23        | 664.80      |         |          |
| Error          | 30 | 1944.81        | 64.83       |         |          |
| C. Total       | 44 | 11252.04       |             | 10.26   | <0.0001  |
| Cultivar       | 4  | 6574.96        |             | 25.36   | <0.0001  |
| Stage          | 2  | 184.40         |             | 1.42    | 0.26     |
| Cultivar*Stage | 8  | 2470.45        |             | 4.76    | 0.0008   |
|                |    |                |             |         |          |
|                |    |                |             |         |          |
|                |    |                |             |         |          |
|                |    |                |             |         |          |
|                |    |                |             |         |          |
|                |    |                |             |         |          |
|                |    |                |             |         |          |
|                |    |                |             |         |          |
|                |    |                |             |         |          |
|                |    |                |             |         |          |
|                |    |                |             |         |          |
|                |    |                |             |         |          |
|                |    |                |             |         |          |

**trans-Citral**

| Source         | DF | Sum of Squares | Mean Square | F Ratio | Prob > F |
|----------------|----|----------------|-------------|---------|----------|
| Model          | 14 | 4925.83        | 351.85      |         |          |
| Error          | 30 | 23.93          | 0.80        |         |          |
| C. Total       | 44 | 4949.76        |             | 441.04  | <0.0001  |
| Cultivar       | 4  | 805.11         |             | 252.30  | <0.0001  |
| Stage          | 2  | 1392.86        |             | 872.97  | <0.0001  |
| Cultivar*Stage | 8  | 2354.79        |             | 368.97  | <0.0001  |

|  |  |  |  |  |
|--|--|--|--|--|
|  |  |  |  |  |
|  |  |  |  |  |
|  |  |  |  |  |
|  |  |  |  |  |

|  |  |  |  |  |
|--|--|--|--|--|
|  |  |  |  |  |
|  |  |  |  |  |
|  |  |  |  |  |
|  |  |  |  |  |
|  |  |  |  |  |
|  |  |  |  |  |
|  |  |  |  |  |

**Geraniol**

| Source         | DF | Sum of Squares | Mean Square | F Ratio | Prob > F |
|----------------|----|----------------|-------------|---------|----------|
| Model          | 14 | 2506.35        | 179.03      |         |          |
| Error          | 30 | 26.18          | 0.87        |         |          |
| C. Total       | 44 | 2532.53        |             | 205.13  | <0.0001  |
| Cultivar       | 4  | 1173.93        |             | 336.27  | <0.0001  |
| Stage          | 2  | 63.32          |             | 36.27   | <0.0001  |
| Cultivar*Stage | 8  | 1281.09        |             | 183.48  | <0.0001  |

|  |  |  |  |  |
|--|--|--|--|--|
|  |  |  |  |  |
|  |  |  |  |  |
|  |  |  |  |  |
|  |  |  |  |  |
|  |  |  |  |  |
|  |  |  |  |  |
|  |  |  |  |  |
|  |  |  |  |  |
|  |  |  |  |  |
|  |  |  |  |  |
|  |  |  |  |  |

**cis-Citral**

| Source         | DF | Sum of Squares | Mean Square | F Ratio | Prob > F |
|----------------|----|----------------|-------------|---------|----------|
| Model          | 14 | 2116.89        | 151.21      |         |          |
| Error          | 30 | 11.72          | 0.39        |         |          |
| C. Total       | 44 | 2128.61        |             | 387.19  | <0.0001  |
| Cultivar       | 4  | 343.43         |             | 219.86  | <0.0001  |
| Stage          | 2  | 742.45         |             | 950.60  | <0.0001  |
| Cultivar*Stage | 8  | 885.92         |             | 283.57  | <0.0001  |

[illegible]

### 1,8- Cineole

| Source         | DF | Sum of Squares | Mean Square | F Ratio | Prob > F |
|----------------|----|----------------|-------------|---------|----------|
| Model          | 14 | 2.95           | 0.21        |         |          |
| Error          | 30 | 0.09           | 0.003       |         |          |
| C. Total       | 44 | 3.04           |             | 71.21   | <0.0001  |
| Cultivar       | 4  | 1.84           |             | 155.11  | <0.0001  |
| Stage          | 2  | 0.19           |             | 32.63   | <0.0001  |
| Cultivar*Stage | 8  | 0.81           |             | 34.03   | <0.0001  |

[illegible]

**Camphor**

| Source         | DF | Sum of Squares | Mean Square | F Ratio | Prob > F |
|----------------|----|----------------|-------------|---------|----------|
| Model          | 14 | 0.90           | 0.06        |         |          |
| Error          | 30 | 0.04           | 0.001       |         |          |
| C. Total       | 44 | 0.94           |             | 48.75   | <0.0001  |
| Cultivar       | 4  | 0.36           |             | 68.05   | <0.0001  |
| Stage          | 2  | 0.17           |             | 63.06   | <0.0001  |
| Cultivar*Stage | 8  | 0.37           |             | 35.21   | <0.0001  |
